# Supplementary material for: The water-soluble argentivorous molecule: Ag+–π interactions in water
Source: Royal Society of Chemistry journal article supplement (doi:10.1039/c3ob40125a), 2013-01-01
Supplement: c3ob40125a.pdf [file c3ob40125a.pdf]

# Supporting Information for Water-Soluble Argentivorous Molecule

Yoichi Habata\*, Yoko Okeda, Mari Ikeda, and Shunsuke Kuwahara

Department of Chemistry, Faculty of Science & Research Center for Materials with  
Integrated Properties, Toho University  
2-2-1 Miyama, Funabashi, Chiba 274-8510, Japan

## Table of Contents

|                                                                                                                                           |    |
|-------------------------------------------------------------------------------------------------------------------------------------------|----|
| <b>Figure S1</b> ( $^1\text{H}$ NMR of <b>3</b> ) and <b>Figure S2</b> ( $^{13}\text{C}$ NMR of <b>3</b> )                                | 2  |
| <b>Figure S3</b> ( $^1\text{H}$ NMR of $\text{Cs}_4\text{L}$ ) and <b>Figure S4</b> ( $^{13}\text{C}$ NMR of $\text{Cs}_4\text{L}$ )      | 3  |
| <b>Figure S5</b> ( $^1\text{H}$ NMR of <b>5</b> ) and <b>Figure S6</b> ( $^{13}\text{C}$ NMR of <b>5</b> )                                | 4  |
| <b>Figure S7</b> . ( $^1\text{H}$ NMR of cesium 4-methylbenzoate)                                                                         | 5  |
| <b>Figure S8</b> (X-ray structure of $\text{Cs}_4\text{L}$ )                                                                              | 6  |
| <b>Figure S9</b> . Cold ESI-MS of $\text{Cs}_4\text{L}$ .                                                                                 | 6  |
| <b>Figure S10</b> . IR spectrum of $\text{Cs}_4\text{L}$ (KBr disk).                                                                      | 6  |
| <b>Table S1</b> (Crystal data and structure refinement for $\text{Cs}_4\text{L}$ )                                                        | 7  |
| <b>Figure S11a</b> and <b>11b</b> ( $\text{Ag}^+$ -ion-induced Cold ESI-Mass spectral changes of $\text{Cs}_4\text{L}$ )                  | 8  |
| <b>Figure S12</b> , <b>S13</b> , and <b>S14</b> ( $\text{Ag}^+$ -ion-induced $^1\text{H}$ NMR spectral changes of $\text{Cs}_4\text{L}$ ) | 9  |
| <b>Table S2</b> ( $\text{Ag}^+$ -ion-induced $^1\text{H}$ NMR spectral changes of $\text{Cs}_4\text{L}$ )                                 | 9  |
| <b>Figure S15</b> and <b>S16</b> ( $\text{Pd}^{2+}$ -ion-induced UV-vis spectral changes of $\text{Cs}_4\text{L}$ )                       | 10 |
| <b>Figure S17</b> and <b>S18</b> (Metal-ion-induced $^1\text{H}$ NMR spectral changes of $\text{Cs}_4\text{L}$ )                          | 11 |
| <b>Table S3</b> (Metal-ion-induced $^1\text{H}$ NMR spectral changes of $\text{Cs}_4\text{L}$ )                                           | 12 |
| <b>Figure S19</b> ( $^1\text{H}$ - $^1\text{H}$ HOHAHA 2D-NMR of a mixture of $\text{Cs}_4\text{L}$ and $\text{Pb}(\text{NO}_3)_2$ )      | 12 |
| <b>Figure S20</b> ( $^1\text{H}$ NMR spectrum of a 1:1 mixture of <b>3</b> and $\text{AgCF}_3\text{SO}_3$ )                               | 13 |
| <b>Figure S21</b> ( $^{13}\text{C}$ NMR spectrum of a 1:1 mixture of <b>3</b> and $\text{AgCF}_3\text{SO}_3$ )                            | 13 |
| <b>Figure S22</b> ( $\text{Ag}^+$ -ion-induced $^1\text{H}$ NMR spectral changes of <b>3</b> )                                            | 14 |
| <b>Table S4</b> (Crystal data and structure refinement for <b>3</b> / $\text{AgCF}_3\text{SO}_3$ )                                        | 15 |
| <b>Figure S23</b> (X-ray structure of <b>5</b> )                                                                                          | 16 |
| <b>Table S5</b> (Crystal data and structure refinement for <b>5</b> )                                                                     | 16 |
| <b>Figure S24</b> (X-ray structure of <b>3</b> )                                                                                          | 17 |
| <b>Table S6</b> (Crystal data and structure refinement for <b>3</b> )                                                                     | 17 |
| <b>Figure S25</b> (Calculations of $\log K$ from UV-vis titration experiments)                                                            | 18 |

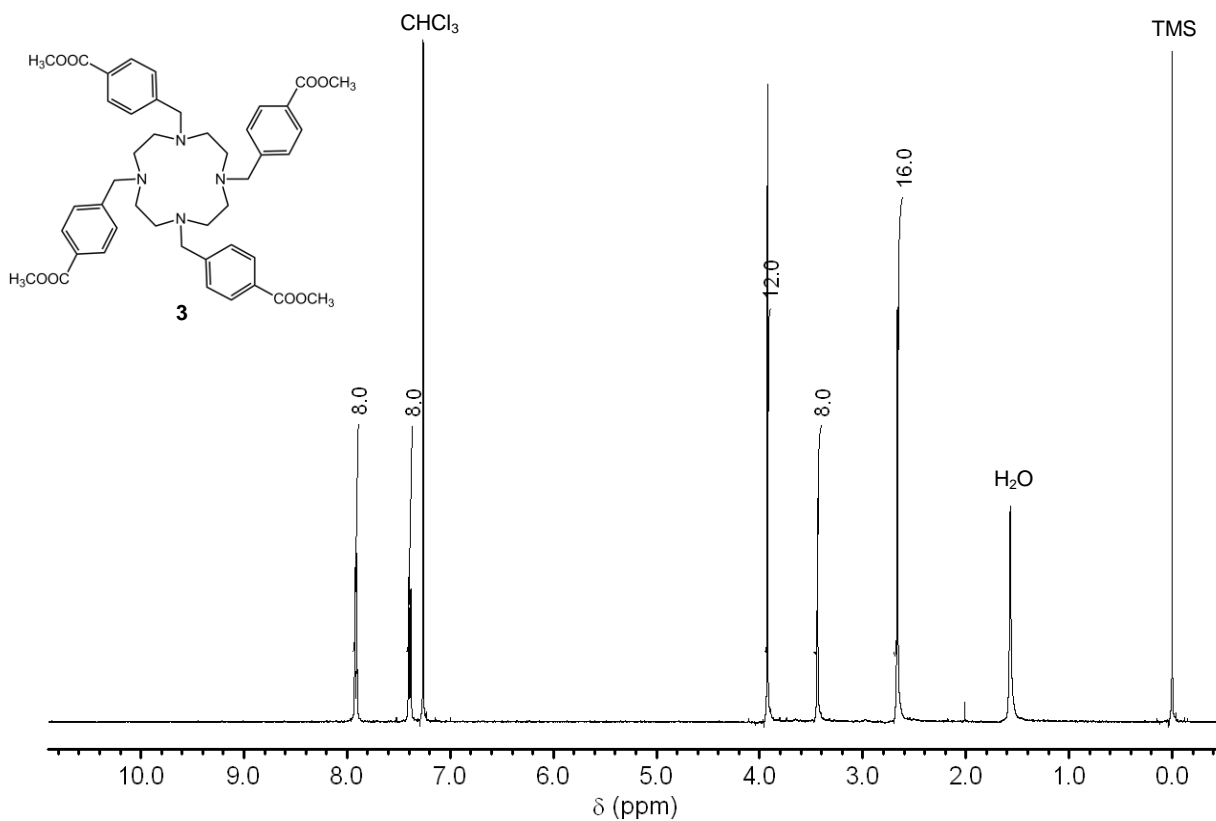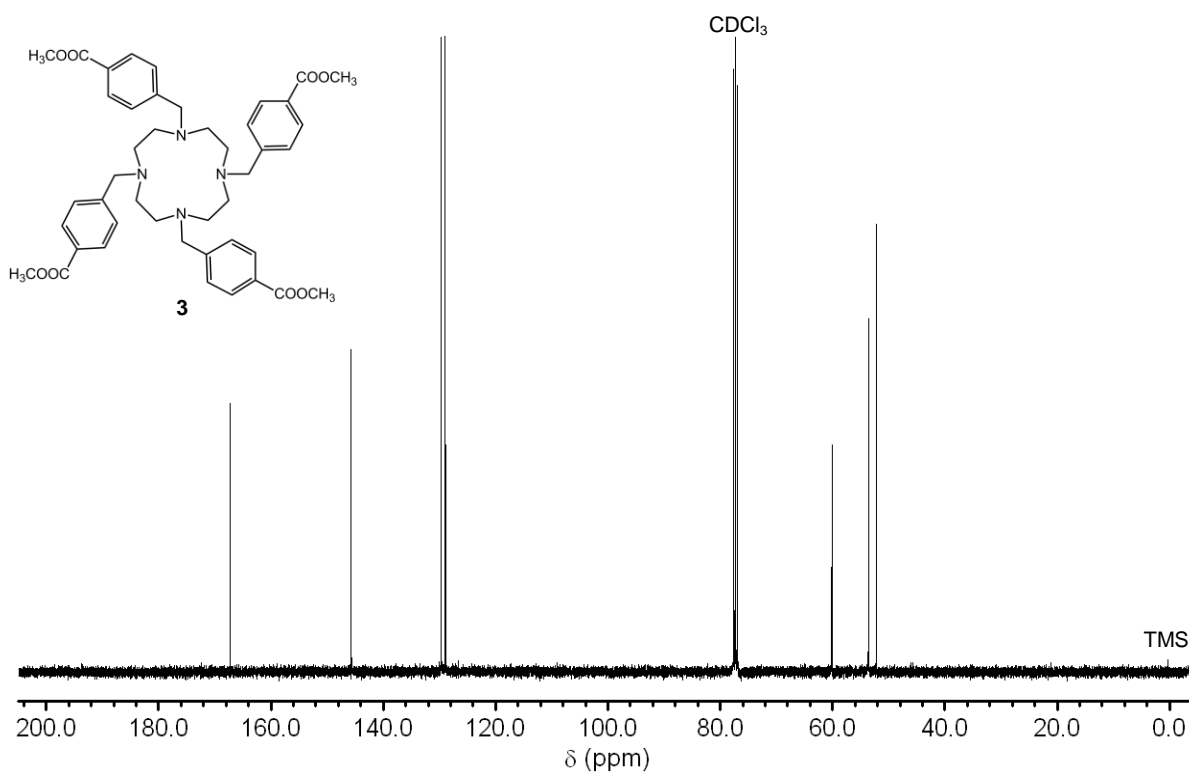

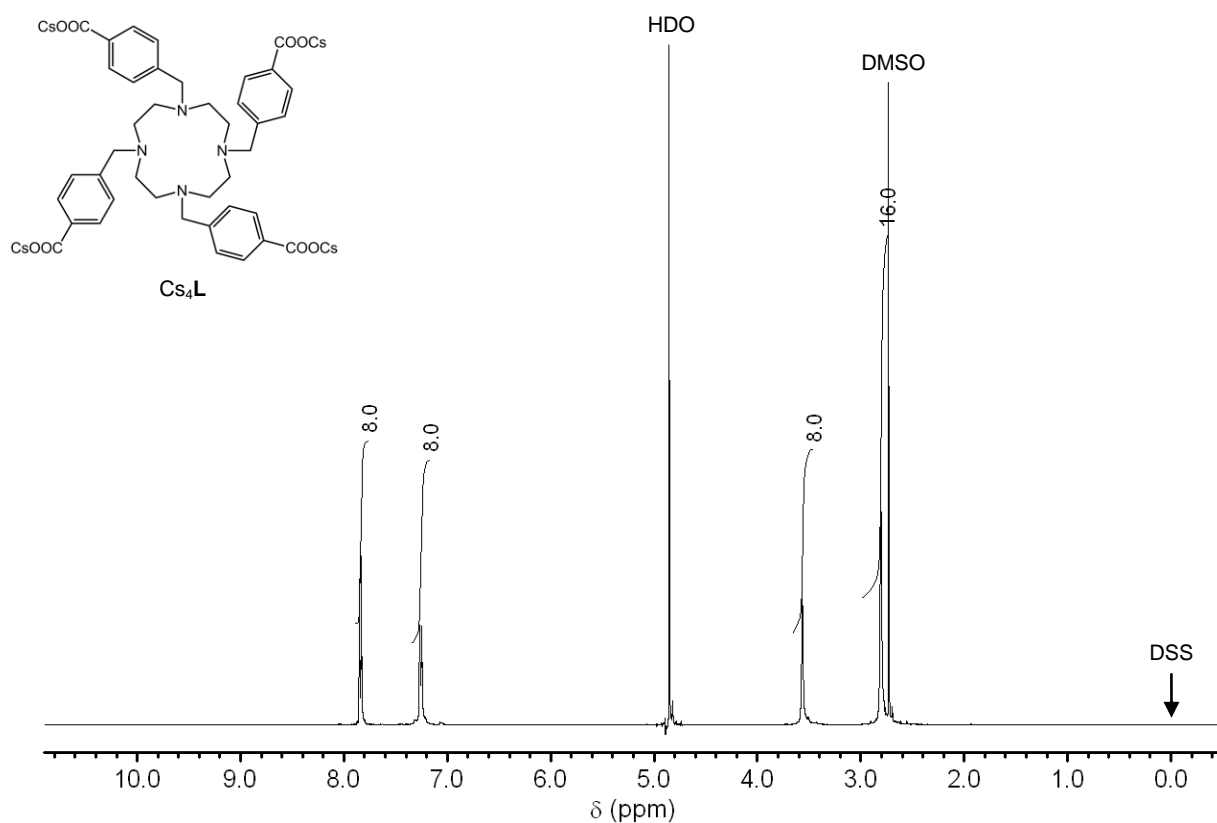

**Figure S3.**  $^1\text{H}$  NMR of tetracesium 4,4',4'',4'''-((1,4,7,10-tetraazacyclododecane-1,4,7,10-tetrayl) tetrakis (methylene))tetrabe-nzoate ( $\text{Cs}_4\text{L}$ ) in  $\text{D}_2\text{O}$ . DSS(standard): Sodium 2,2-dimethyl-2-silapentane-5-sulfonate (298 K).

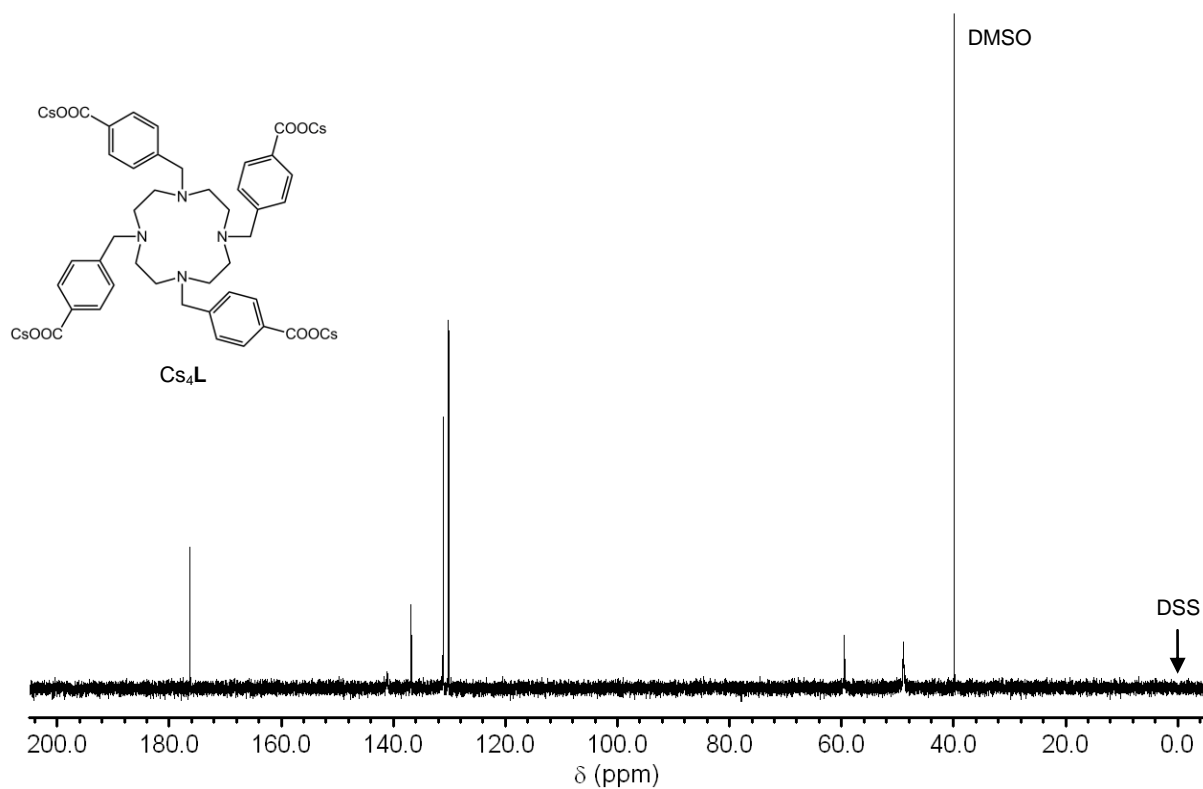

**Figure S4.**  $^{13}\text{C}$  NMR of tetracesium 4,4',4'',4'''-((1,4,7,10-tetraazacyclododecane-1,4,7,10-tetrayl) tetrakis (methylene))tetrabe-nzoate ( $\text{Cs}_4\text{L}$ ) in  $\text{D}_2\text{O}$ . DSS(standard): Sodium 2,2-dimethyl-2-silapentane-5-sulfonate (298 K).

K).

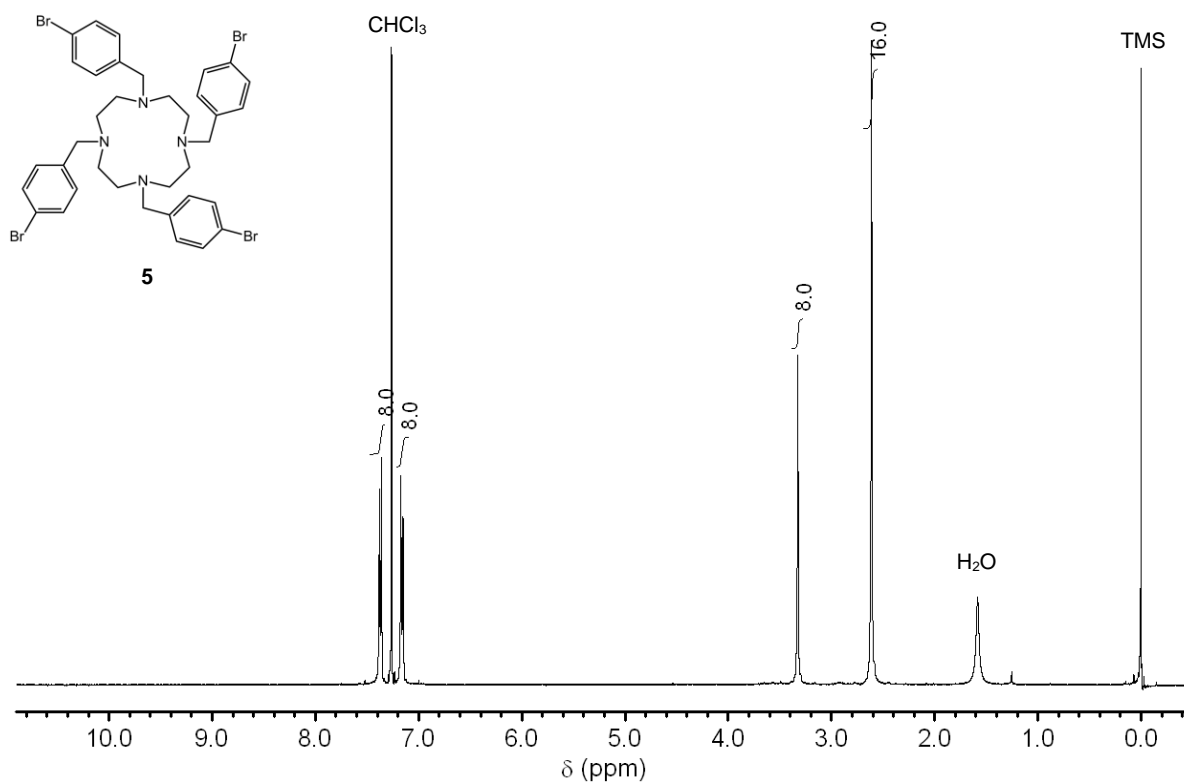

**Figure S5.**  $^1\text{H}$  NMR of 1,4,7,10-tetrakis(4-bromobenzyl)-1,4,7,10-tetraazacyclododecane (**5**) in  $\text{CDCl}_3$  (298 K).

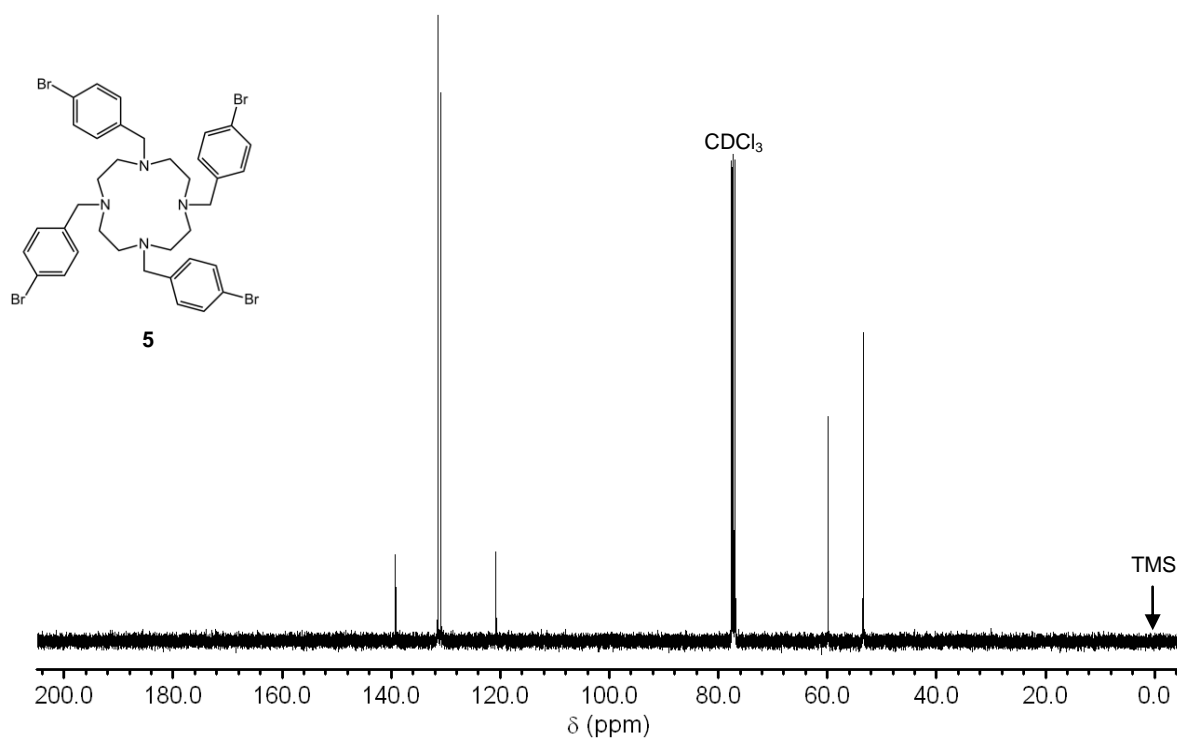

**Figure S6.**  $^{13}\text{C}$  NMR of 1,4,7,10-tetrakis(4-bromobenzyl)-1,4,7,10-tetraazacyclododecane (**5**) in  $\text{CDCl}_3$  (298 K).

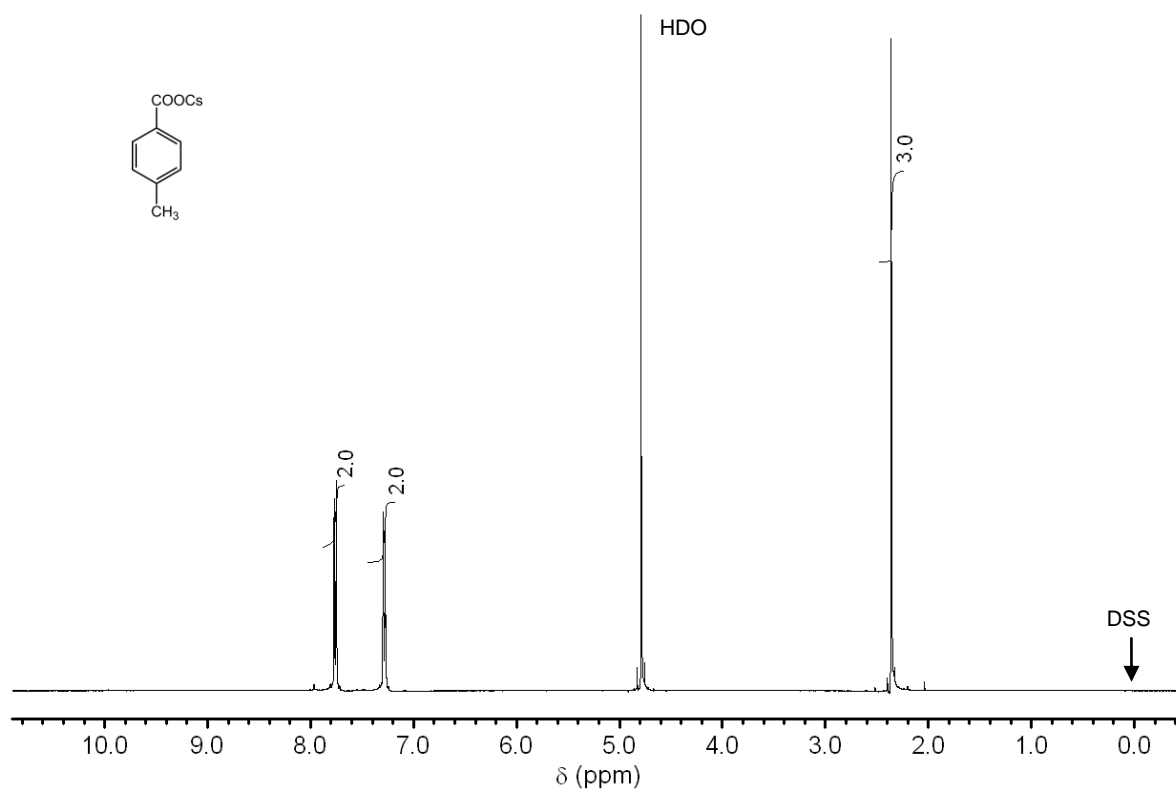

**Figure S7.** <sup>1</sup>H NMR of cesium 4-methylbenzoate in D<sub>2</sub>O. DSS(standard): Sodium 2,2-dimethyl-2-silapentane-5-sulfonate (298 K).

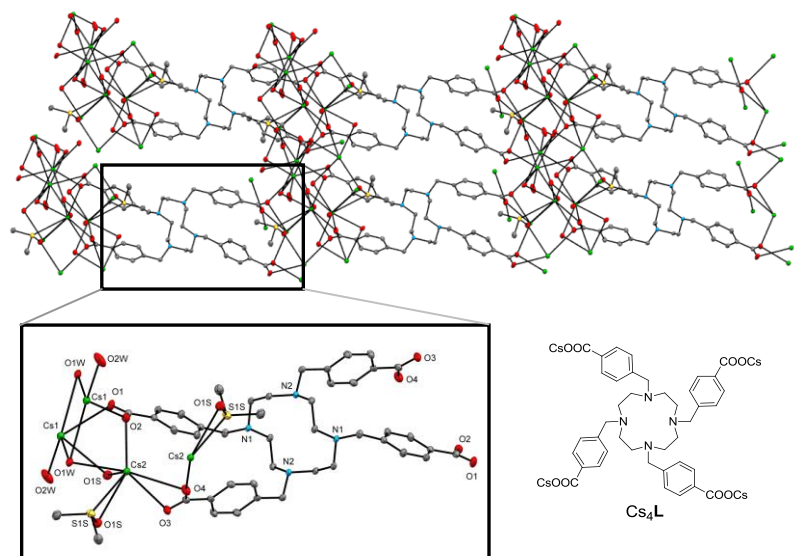

**Figure S8.** ORTEP diagrams of  $\text{Cs}_4\text{L}$ . (top) Packing diagram and (bottom) expanded diagram. Two waters and two DMSOs bind the cesium ions in  $\text{Cs}_4\text{L}$ . Hydrogen atoms omitted.

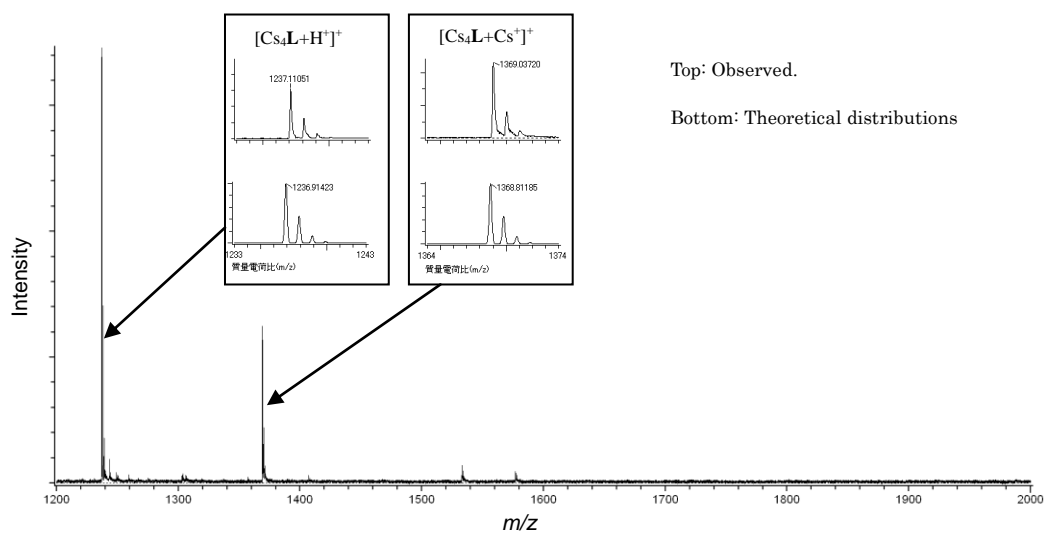

**Figure S9.** Cold ESI-MS of  $\text{Cs}_4\text{L}$  ( $\text{H}_2\text{O}:\text{CH}_3\text{OH} = 1:7$ ).

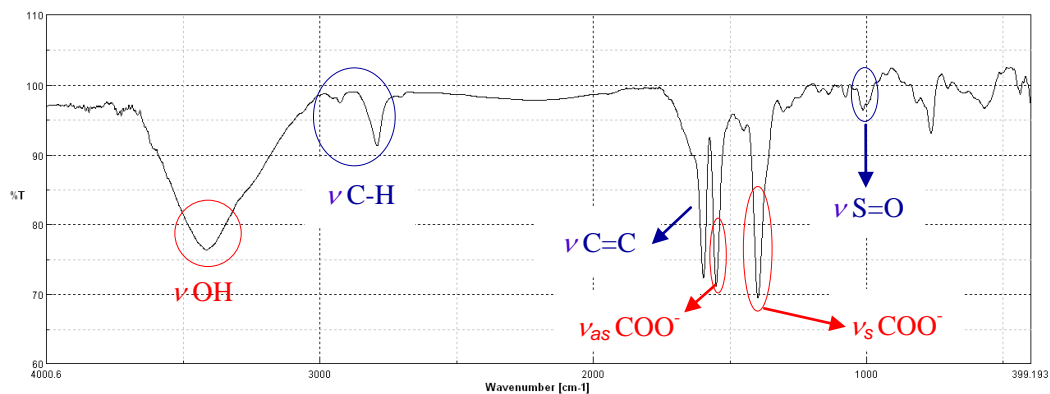

**Figure S10.** IR spectrum of  $\text{Cs}_4\text{L}$  (KBr disk). The IR data suggests that  $\text{Cs}_4\text{L}$  includes  $\text{H}_2\text{O}$  and DMSO.

**Table S1.** Crystal data and structure refinement for Cs<sub>4</sub>L.

|                                   |                                                                                 |                    |
|-----------------------------------|---------------------------------------------------------------------------------|--------------------|
| Identification code               | Cs <sub>4</sub> L                                                               |                    |
| Empirical formula                 | C <sub>22</sub> H <sub>30</sub> Cs <sub>2</sub> N <sub>2</sub> O <sub>7</sub> S |                    |
| Formula weight                    | 732.36                                                                          |                    |
| Temperature                       | 100 K                                                                           |                    |
| Wavelength                        | 0.71073 Å                                                                       |                    |
| Crystal system                    | Triclinic                                                                       |                    |
| Space group                       | P-1                                                                             |                    |
| Unit cell dimensions              | a = 8.9076(5) Å                                                                 | α = 97.8800(10)°.  |
|                                   | b = 9.0591(5) Å                                                                 | β = 103.7500(10)°. |
|                                   | c = 17.7228(10) Å                                                               | γ = 102.0670(10)°. |
| Volume                            | 1331.93(13) Å <sup>3</sup>                                                      |                    |
| Z                                 | 2                                                                               |                    |
| Density (calculated)              | 1.826 Mg/m <sup>3</sup>                                                         |                    |
| Absorption coefficient            | 2.858 mm <sup>-1</sup>                                                          |                    |
| F(000)                            | 716                                                                             |                    |
| Crystal size                      | 0.26 x 0.17 x 0.03 mm <sup>3</sup>                                              |                    |
| Theta range for data collection   | 1.21 to 27.48°.                                                                 |                    |
| Index ranges                      | -11 ≤ h ≤ 11, -8 ≤ k ≤ 11, -22 ≤ l ≤ 20                                         |                    |
| Reflections collected             | 8549                                                                            |                    |
| Independent reflections           | 6039 [R(int) = 0.0161]                                                          |                    |
| Completeness to theta = 27.48 °   | 98.7 %                                                                          |                    |
| Absorption correction             | Empirical                                                                       |                    |
| Max. and min. transmission        | 0.9091 and 0.5203                                                               |                    |
| Refinement method                 | Full-matrix least-squares on F <sup>2</sup>                                     |                    |
| Data / restraints / parameters    | 6039 / 0 / 325                                                                  |                    |
| Goodness-of-fit on F <sup>2</sup> | 1.134                                                                           |                    |
| Final R indices [I > 2σ(I)]       | R1 = 0.0233, wR2 = 0.0621                                                       |                    |
| R indices (all data)              | R1 = 0.0287, wR2 = 0.0723                                                       |                    |
| Largest diff. peak and hole       | 0.672 and -0.840 e. Å <sup>-3</sup>                                             |                    |



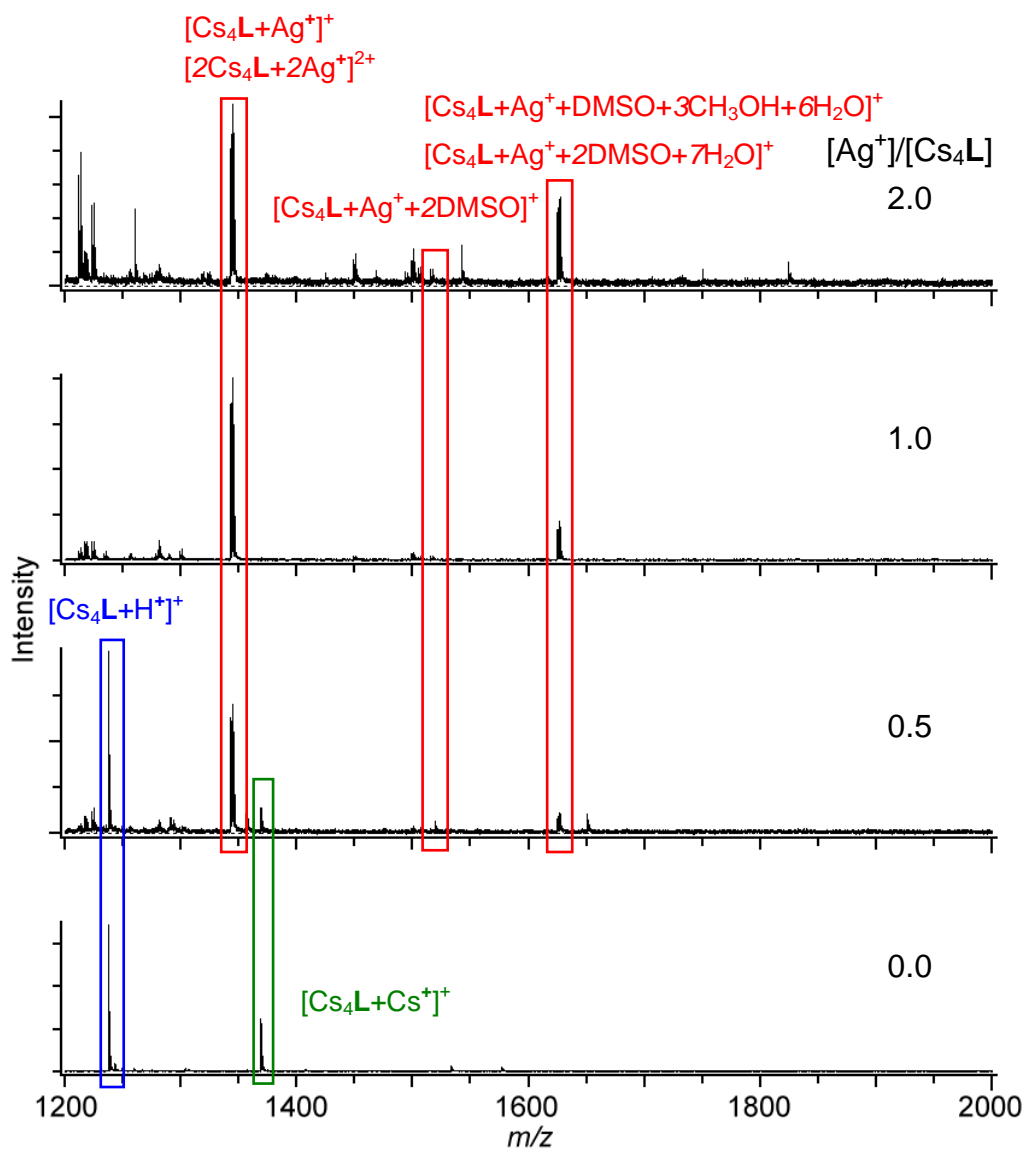

**Figure S11a.**  $\text{Ag}^+$ -ion-induced Cold ESI-Mass spectral changes ( $\text{CH}_3\text{OH}$ , 298 K).

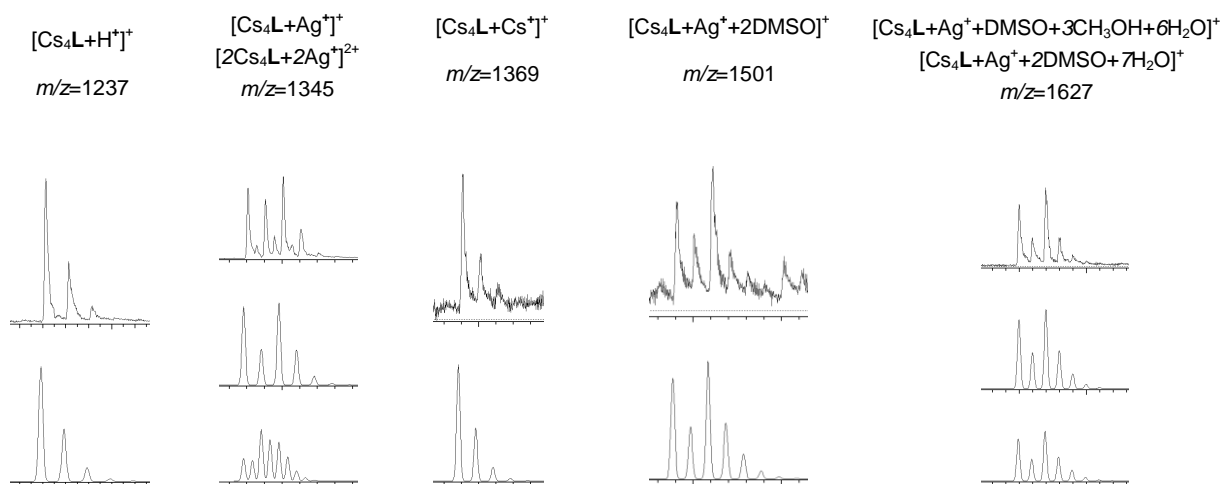

**Figure S11b.** Observed ion peaks (top) and theoretical distributions (bottom) in Figure S10a.

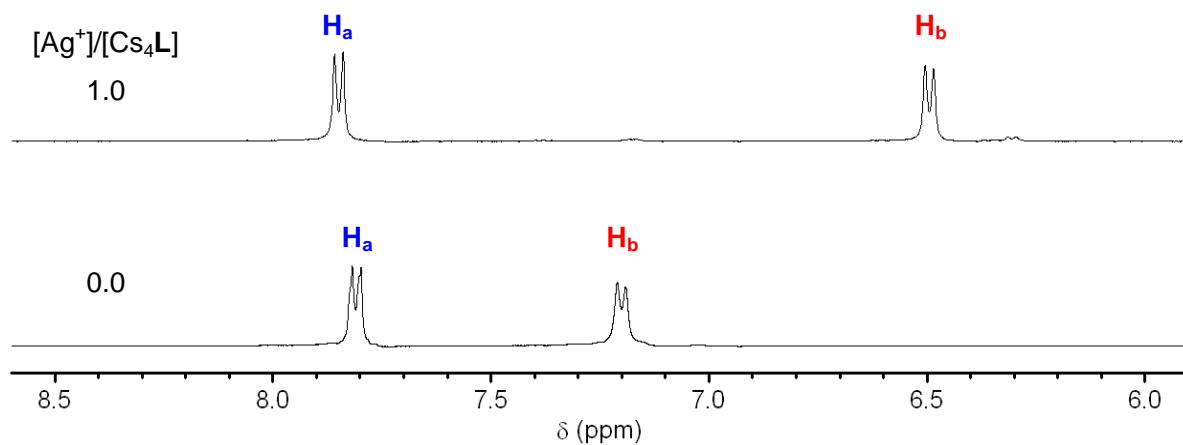

Figure S12. AgCF<sub>3</sub>SO<sub>3</sub>-induced <sup>1</sup>H-NMR spectral changes (D<sub>2</sub>O, 298 K)

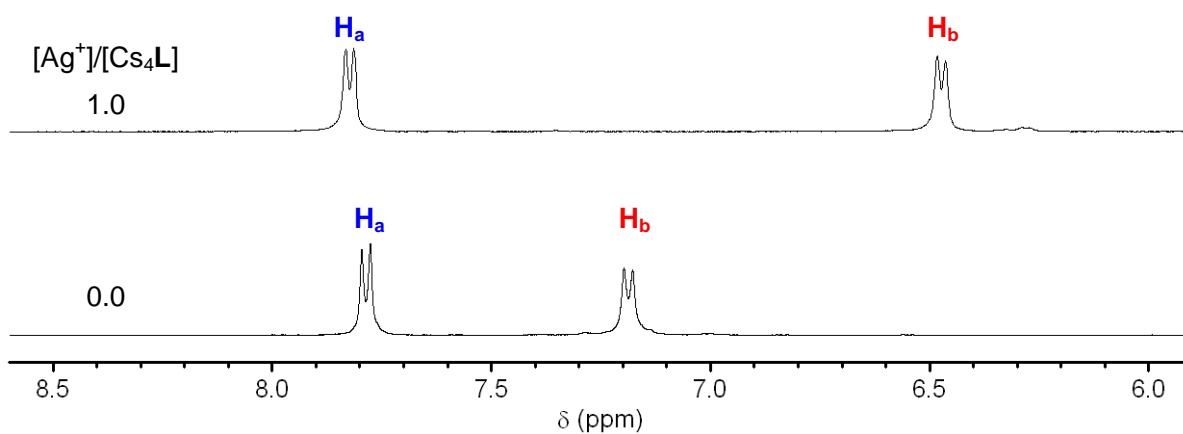

Figure S13. AgPF<sub>6</sub>-induced <sup>1</sup>H-NMR spectral changes (D<sub>2</sub>O, 298 K)

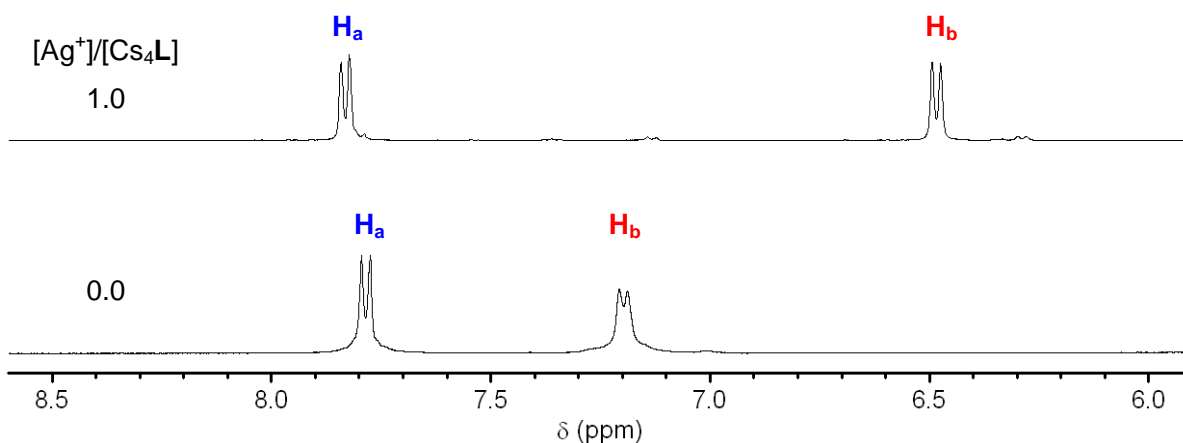

Figure S14. AgNO<sub>3</sub>-induced <sup>1</sup>H-NMR spectral changes (D<sub>2</sub>O, 298 K)

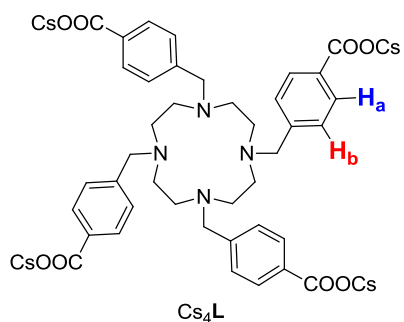

Table S2. <sup>1</sup>H NMR chemical shift changes of the protons at 2'-/6'- positions (**H<sub>b</sub>**) (δ/ppm).

|                                   |       |
|-----------------------------------|-------|
| AgCF <sub>3</sub> SO <sub>3</sub> | -0.69 |
| AgPF <sub>6</sub>                 | -0.72 |
| AgNO <sub>3</sub>                 | -0.72 |

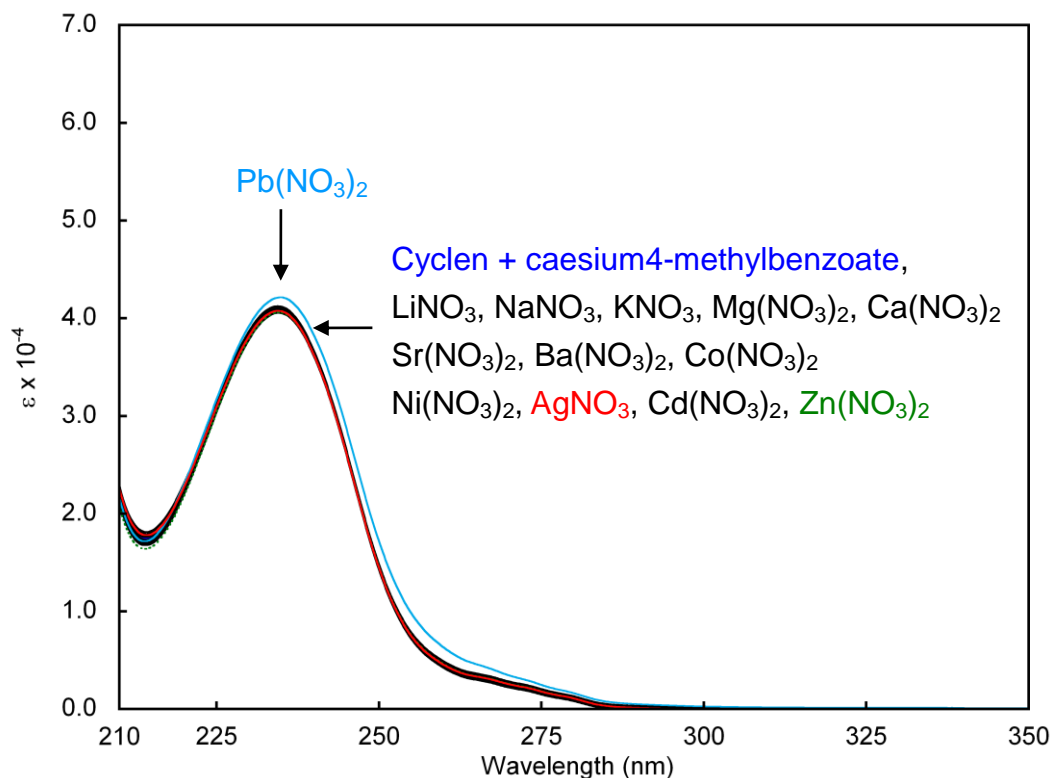

**Figure S15.**  $\text{Pb}^{2+}$ -induced UV spectral changes. (Cyclen : Caesium 4-methylbenzoate=1:4) [Caesium 4-methylbenzoate] =  $2.0 \times 10^{-4}$  mol/L (in water).

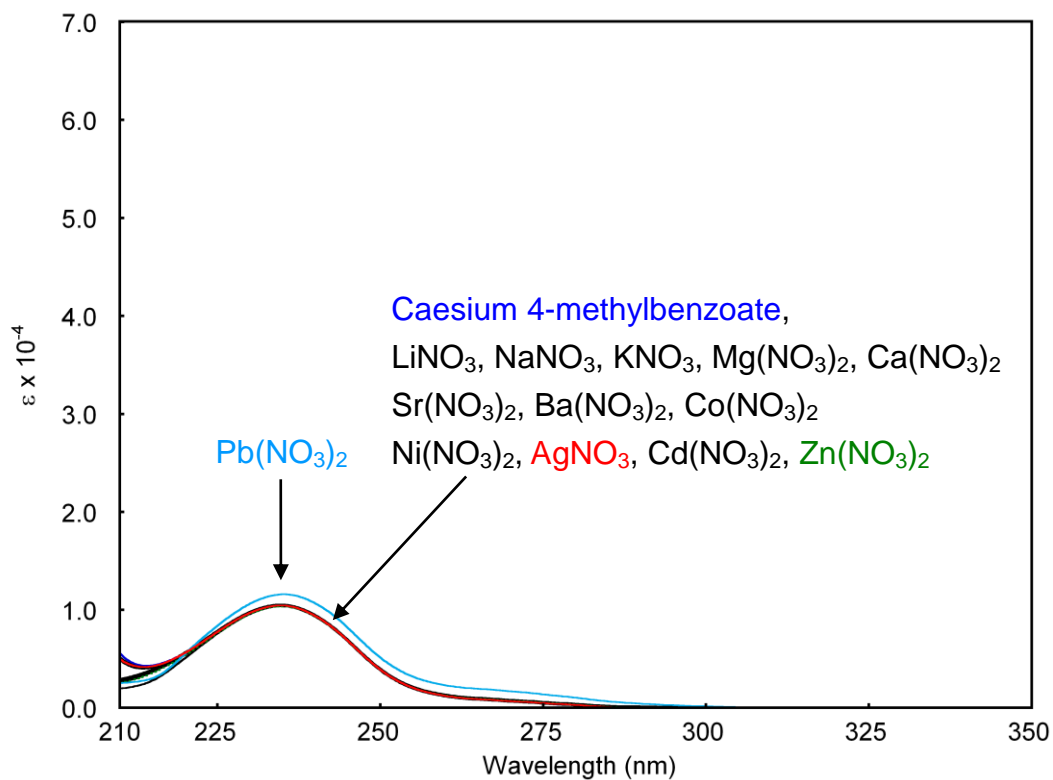

**Figure S16.**  $\text{Pb}^{2+}$ -induced UV spectral changes. [Caesium 4-methylbenzoate] =  $5.0 \times 10^{-5}$  mol/L (in water).

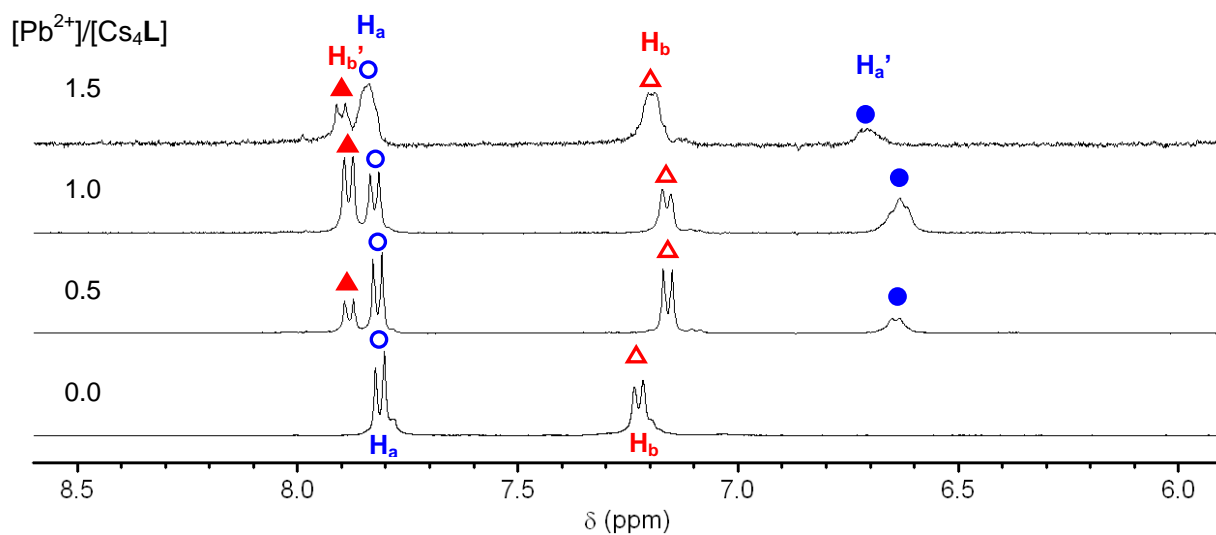

**Figure S17.**  $\text{Pb}(\text{NO}_3)_2$ -induced  $^1\text{H-NMR}$  spectral changes ( $\text{D}_2\text{O}$ , 298 K).

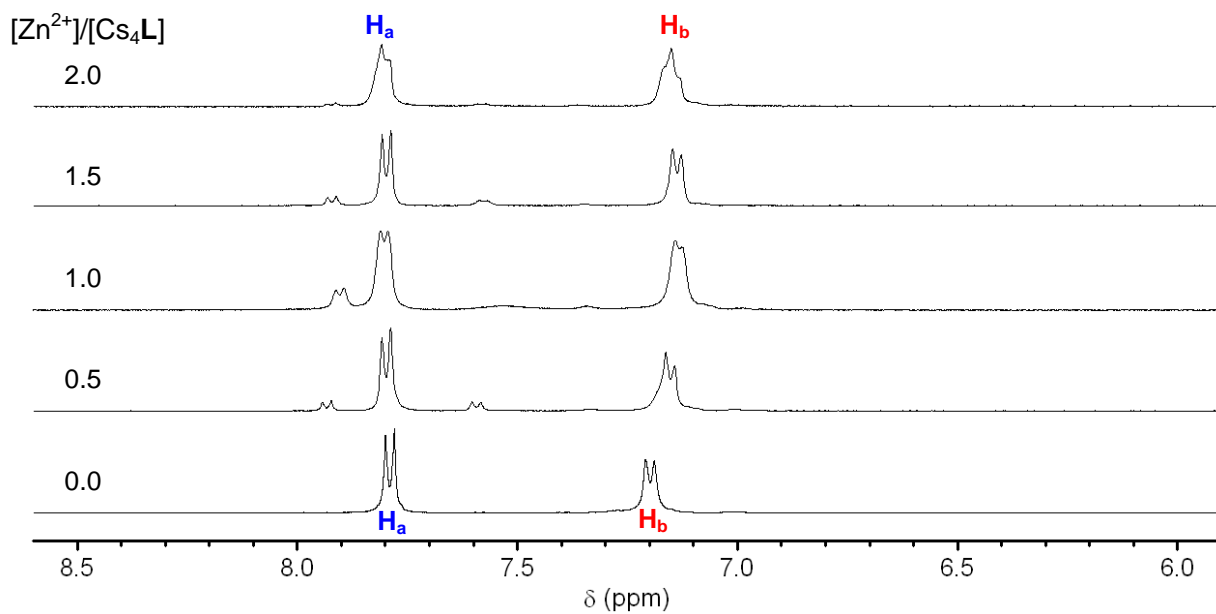

**Figure S18.**  $\text{Zn}(\text{NO}_3)_2$ -induced  $^1\text{H-NMR}$  spectral changes ( $\text{D}_2\text{O}$ , 298 K).

Table S3  $^1\text{H}$  NMR chemical shift changes of the protons at 2'-/6'- positions ( $\delta/\text{ppm}$ ).

|                                   |              |
|-----------------------------------|--------------|
| $\text{LiNO}_3$                   | -0.01        |
| $\text{NaNO}_3$                   | -0.01        |
| $\text{KNO}_3$                    | -0.01        |
| $\text{Mg}(\text{NO}_3)_2$        | -0.04        |
| $\text{Ca}(\text{NO}_3)_2$        | -0.06        |
| $\text{Sr}(\text{NO}_3)_2$        | -0.01        |
| $\text{Co}(\text{NO}_3)_2$        | -0.00        |
| $\text{Ni}(\text{NO}_3)_2$        | -0.03        |
| <b><math>\text{AgNO}_3</math></b> | <b>-0.72</b> |
| $\text{Zn}(\text{NO}_3)_2$        | -0.06        |

Negative values denote higher-field shifts.

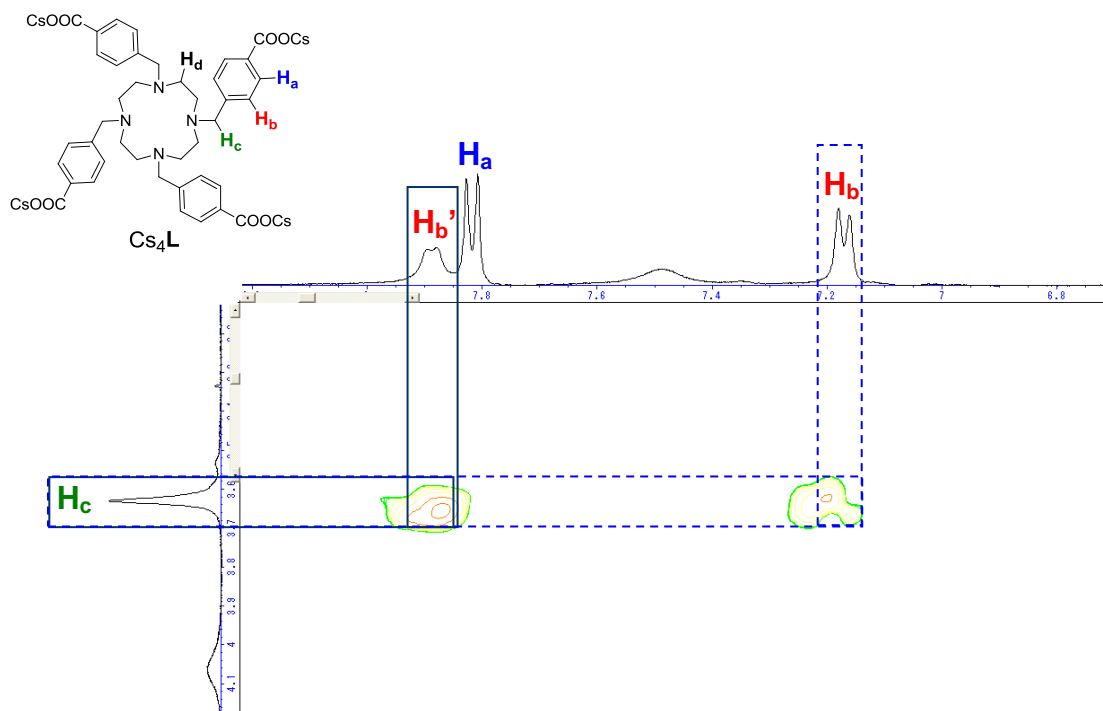

Figure S19.  $^1\text{H}$ - $^1\text{H}$  HOHAHA NMR  $[\text{Pb}^{2+}]/[\text{Cs}_4\text{L}] = 0.5$  in  $\text{CDCl}_3/\text{CD}_3\text{OD}$ .

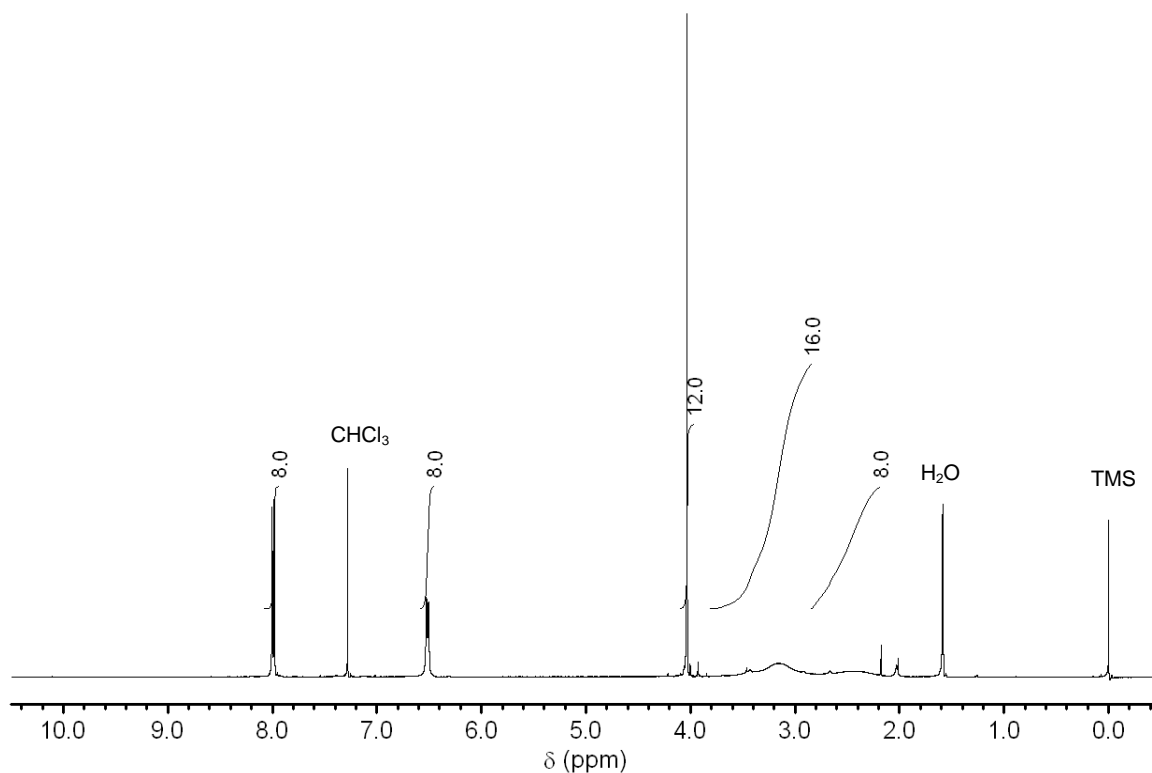

**Figure S20.**  $^1\text{H}$  NMR of a 1:1 mixture of tetramethy 4,4',4'',4'''-[1,4,7,10-tetraazacyclododecane-1,4,7,10-tetrayltetrakis(m-ethylene)]tetrabenzoate (**3**) and  $\text{AgCF}_3\text{SO}_3$  ( $\text{CDCl}_3/\text{CD}_3\text{OD}$ , 298 K).

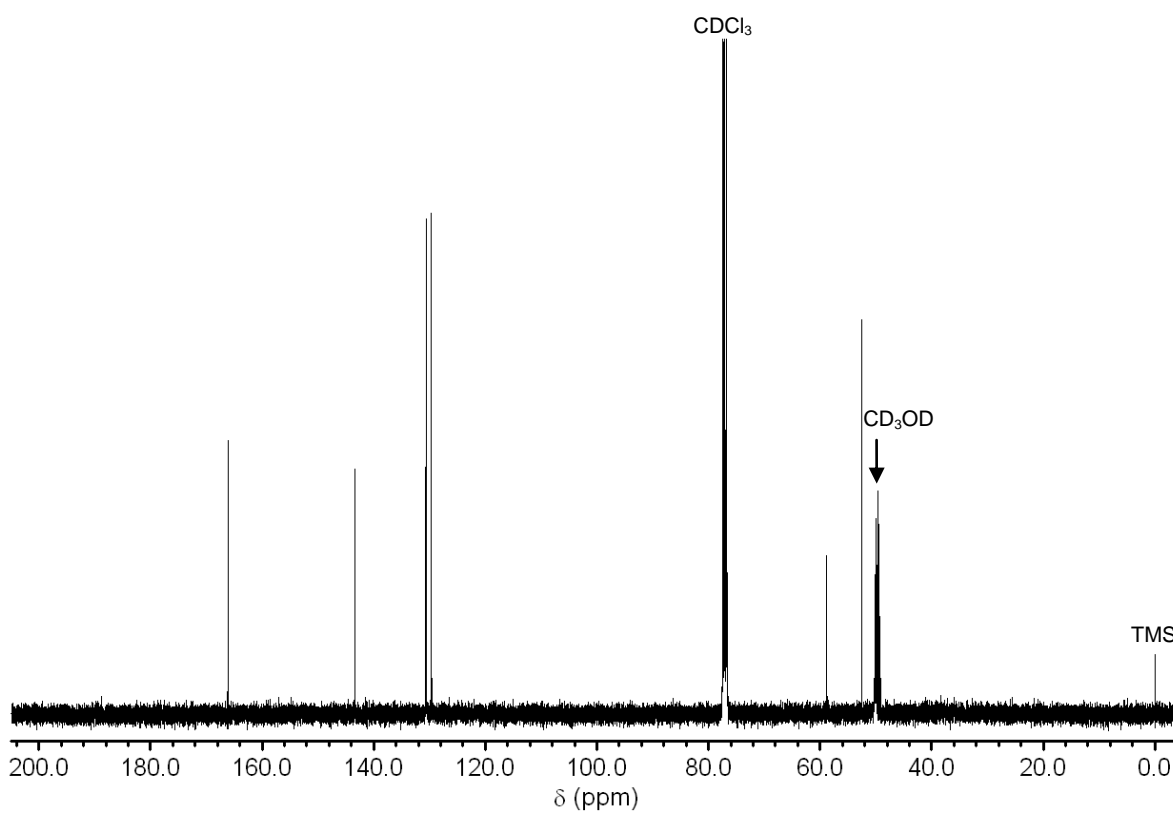

**Figure S21.**  $^{13}\text{C}$  NMR of a 1:1 mixture of tetramethy 4,4',4'',4'''-[1,4,7,10-tetraazacyclododecane-1,4,7,10-tetrayltetrakis(m-ethylene)]tetrabenzoate (**3**) and  $\text{AgCF}_3\text{SO}_3$  ( $\text{CDCl}_3/\text{CD}_3\text{OD}$ , 298 K). The  $^{13}\text{C}$  signals of the  $\text{CF}_3\text{SO}_3$  anions was not observed under the conditions.

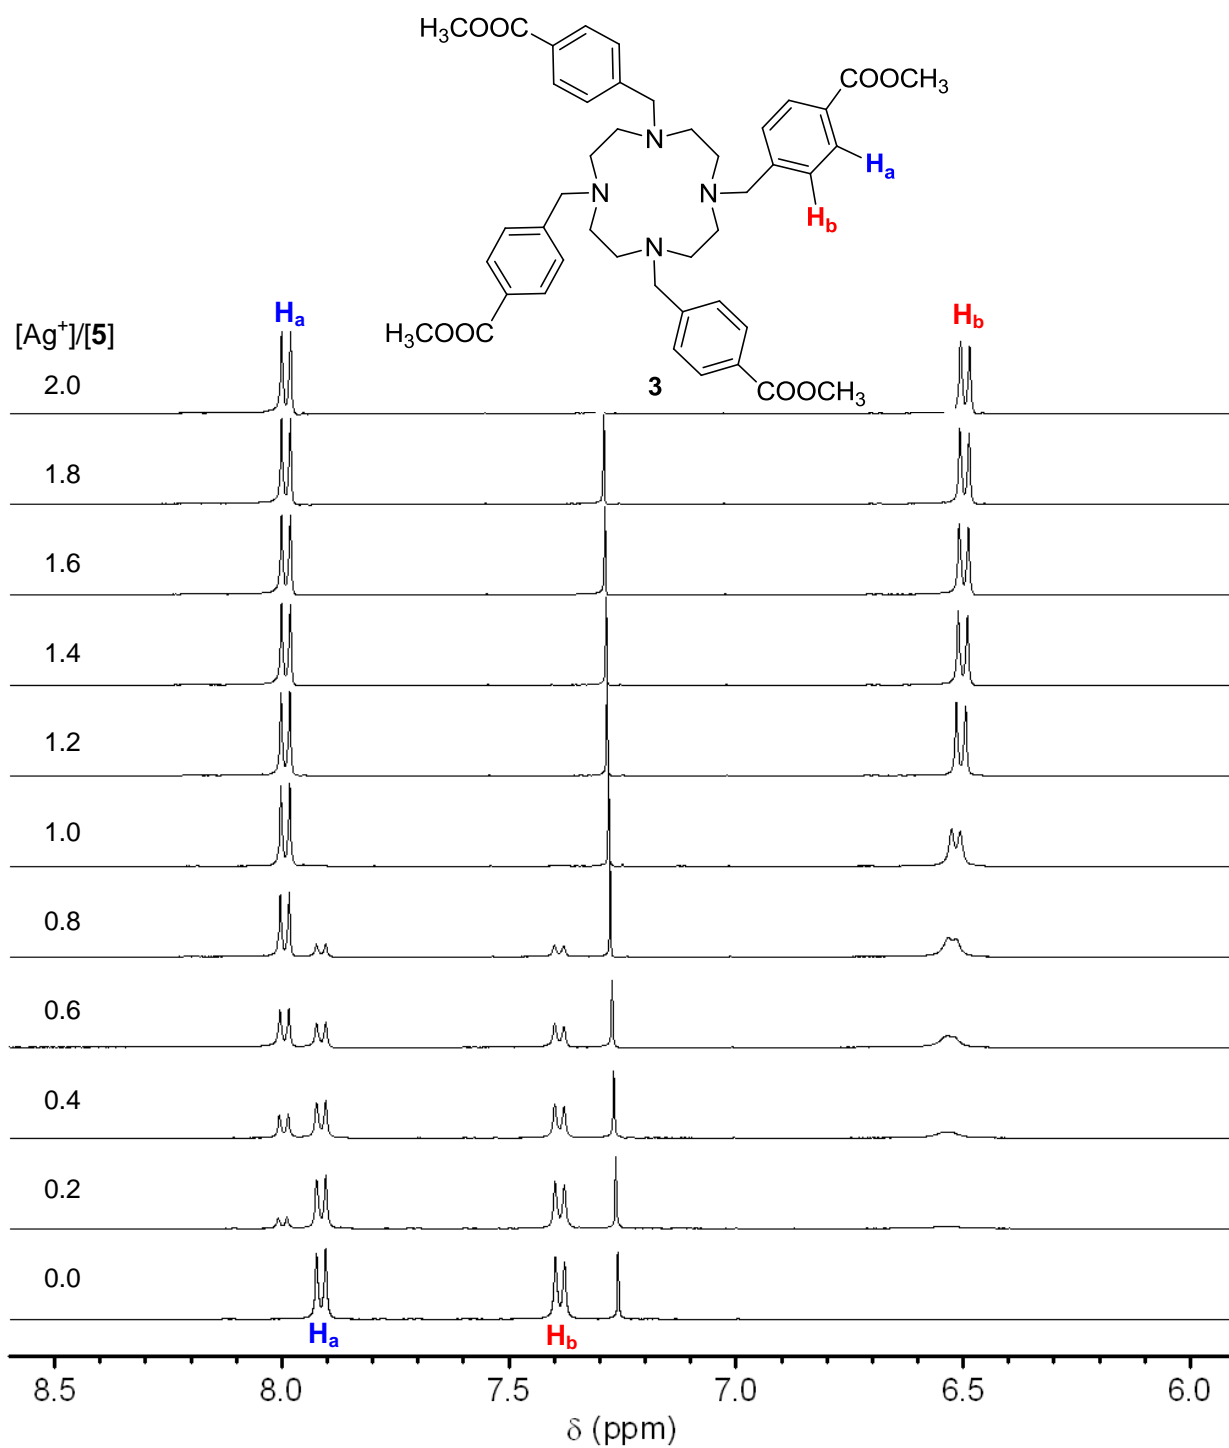

**Figure S22.**  $\text{AgCF}_3\text{SO}_3$ -induced  $^1\text{H-NMR}$  spectral changes ( $\text{CD}_3\text{OD}/\text{CDCl}_3$ , 298 K). The  $H_b$  ( $2'/6'$ -positions) and  $H_a$  ( $3'/5'$ -positions) protons were shifted to higher and lower field by ca.  $-0.87$ , and  $+0.08$  ppm, respectively.

**Table S4.** Crystal data and structure refinement for **3/AgCF<sub>3</sub>SO<sub>3</sub>**.

|                                   |                                                                                                               |          |
|-----------------------------------|---------------------------------------------------------------------------------------------------------------|----------|
| Identification code               | <b>3/AgCF<sub>3</sub>SO<sub>3</sub></b>                                                                       |          |
| Empirical formula                 | C <sub>90</sub> H <sub>106</sub> Ag <sub>2</sub> F <sub>6</sub> N <sub>8</sub> O <sub>23</sub> S <sub>2</sub> |          |
| Formula weight                    | 2061.69                                                                                                       |          |
| Temperature                       | 120 K                                                                                                         |          |
| Wavelength                        | 0.71073 Å                                                                                                     |          |
| Crystal system                    | Tetragonal                                                                                                    |          |
| Space group                       | P4/n                                                                                                          |          |
| Unit cell dimensions              | a = 13.997(4) Å                                                                                               | α = 90°. |
|                                   | b = 13.997(4) Å                                                                                               | β = 90°. |
|                                   | c = 23.804(6) Å                                                                                               | γ = 90°. |
| Volume                            | 4664(2) Å <sup>3</sup>                                                                                        |          |
| Z                                 | 2                                                                                                             |          |
| Density (calculated)              | 1.468 Mg/m <sup>3</sup>                                                                                       |          |
| Absorption coefficient            | 0.553 mm <sup>-1</sup>                                                                                        |          |
| F(000)                            | 2132                                                                                                          |          |
| Crystal size                      | 0.21 x 0.20 x 0.10 mm <sup>3</sup>                                                                            |          |
| Theta range for data collection   | 0.86 to 28.33°.                                                                                               |          |
| Index ranges                      | -18<=h<=18, -18<=k<=18, -31<=l<=18                                                                            |          |
| Reflections collected             | 34383                                                                                                         |          |
| Independent reflections           | 5822 [R(int) = 0.0542]                                                                                        |          |
| Completeness to theta = 28.33°    | 99.6 %                                                                                                        |          |
| Absorption correction             | Empirical                                                                                                     |          |
| Max. and min. transmission        | 0.9462 and 0.8913                                                                                             |          |
| Refinement method                 | Full-matrix least-squares on F <sup>2</sup>                                                                   |          |
| Data / restraints / parameters    | 5822 / 0 / 332                                                                                                |          |
| Goodness-of-fit on F <sup>2</sup> | 1.130                                                                                                         |          |
| Final R indices [I>2sigma(I)]     | R1 = 0.0562, wR2 = 0.1381                                                                                     |          |
| R indices (all data)              | R1 = 0.0723, wR2 = 0.1502                                                                                     |          |
| Largest diff. peak and hole       | 1.793 and -0.814 e.Å <sup>-3</sup>                                                                            |          |



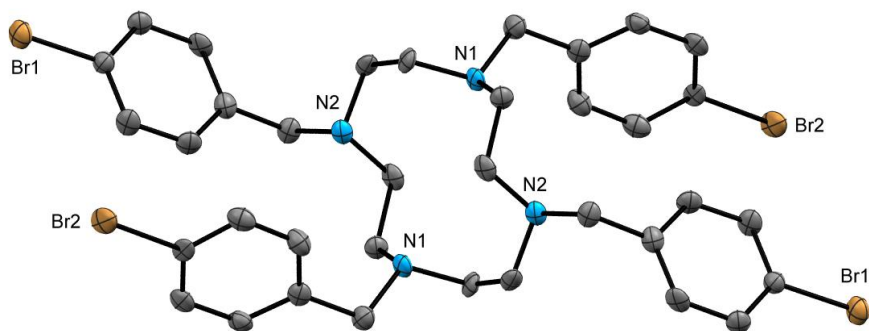

**Figure S23.** ORTEP diagram of **5**. Hydrogen atoms are omitted.

**Table S5.** Crystal data and structure refinement for **5**.

|                                   |                                                                |                 |
|-----------------------------------|----------------------------------------------------------------|-----------------|
| Identification code               | <b>5</b>                                                       |                 |
| Empirical formula                 | C <sub>36</sub> H <sub>40</sub> Br <sub>4</sub> N <sub>4</sub> |                 |
| Formula weight                    | 848.36                                                         |                 |
| Temperature                       | 100 K                                                          |                 |
| Wavelength                        | 0.71073 Å                                                      |                 |
| Crystal system                    | Triclinic                                                      |                 |
| Space group                       | P-1                                                            |                 |
| Unit cell dimensions              | a = 7.399(3) Å                                                 | α = 95.954(8)°. |
|                                   | b = 9.641(5) Å                                                 | β = 96.675(8)°. |
|                                   | c = 12.392(6) Å                                                | γ = 96.258(8)°. |
| Volume                            | 866.7(7) Å <sup>3</sup>                                        |                 |
| Z                                 | 1                                                              |                 |
| Density (calculated)              | 1.625 Mg/m <sup>3</sup>                                        |                 |
| Absorption coefficient            | 4.675 mm <sup>-1</sup>                                         |                 |
| F(000)                            | 424                                                            |                 |
| Crystal size                      | 0.29 x 0.22 x 0.20 mm <sup>3</sup>                             |                 |
| Theta range for data collection   | 1.67 to 27.48°.                                                |                 |
| Index ranges                      | -9 ≤ h ≤ 8, -12 ≤ k ≤ 11, -14 ≤ l ≤ 16                         |                 |
| Reflections collected             | 5174                                                           |                 |
| Independent reflections           | 3794 [R(int) = 0.0420]                                         |                 |
| Completeness to theta = 27.48°    | 95.4 %                                                         |                 |
| Absorption correction             | Empirical                                                      |                 |
| Max. and min. transmission        | 0.4579 and 0.3442                                              |                 |
| Refinement method                 | Full-matrix least-squares on F <sup>2</sup>                    |                 |
| Data / restraints / parameters    | 3794 / 12 / 199                                                |                 |
| Goodness-of-fit on F <sup>2</sup> | 1.022                                                          |                 |
| Final R indices [I > 2σ(I)]       | R1 = 0.0966, wR2 = 0.2542                                      |                 |
| R indices (all data)              | R1 = 0.1281, wR2 = 0.2815                                      |                 |
| Largest diff. peak and hole       | 3.941 and -2.395 e. Å <sup>-3</sup>                            |                 |

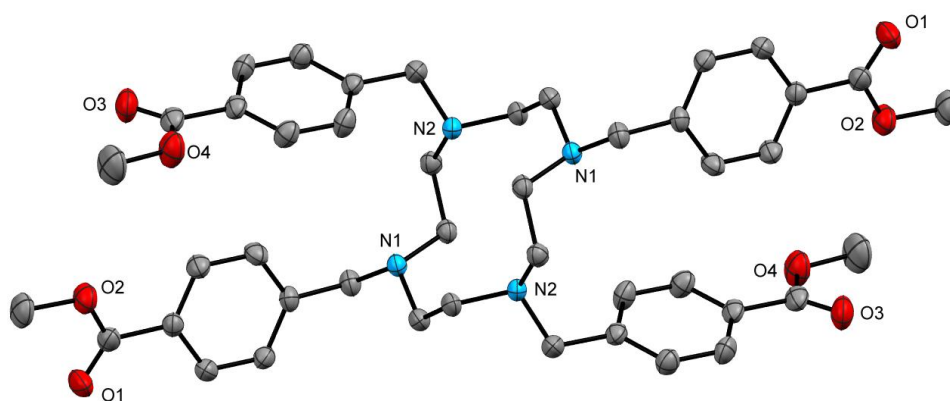

**Figure S24.** X-ray structure of **3**. Hydrogen atoms are omitted.

**Table S6.** Crystal data and structure refinement for **3**.

|                                   |                                                               |                  |
|-----------------------------------|---------------------------------------------------------------|------------------|
| Identification code               | <b>3</b>                                                      |                  |
| Empirical formula                 | C <sub>44</sub> H <sub>52</sub> N <sub>4</sub> O <sub>8</sub> |                  |
| Formula weight                    | 764.90                                                        |                  |
| Temperature                       | 173 K                                                         |                  |
| Wavelength                        | 0.71073 Å                                                     |                  |
| Crystal system                    | Triclinic                                                     |                  |
| Space group                       | P-1                                                           |                  |
| Unit cell dimensions              | a = 10.0192(9) Å                                              | α = 110.849(2)°. |
|                                   | b = 10.1213(9) Å                                              | β = 103.926(2)°. |
|                                   | c = 11.6590(11) Å                                             | γ = 103.909(2)°. |
| Volume                            | 1000.74(16) Å <sup>3</sup>                                    |                  |
| Z                                 | 1                                                             |                  |
| Density (calculated)              | 1.269 Mg/m <sup>3</sup>                                       |                  |
| Absorption coefficient            | 0.088 mm <sup>-1</sup>                                        |                  |
| F(000)                            | 408                                                           |                  |
| Crystal size                      | 0.48 x 0.36 x 0.21 mm <sup>3</sup>                            |                  |
| Theta range for data collection   | 2.30 to 28.27°.                                               |                  |
| Index ranges                      | -13 ≤ h ≤ 13, -11 ≤ k ≤ 13, -15 ≤ l ≤ 12                      |                  |
| Reflections collected             | 7524                                                          |                  |
| Independent reflections           | 4903 [R(int) = 0.0181]                                        |                  |
| Completeness to theta = 28.27°    | 98.7 %                                                        |                  |
| Absorption correction             | Empirical                                                     |                  |
| Max. and min. transmission        | 0.9817 and 0.9594                                             |                  |
| Refinement method                 | Full-matrix least-squares on F <sup>2</sup>                   |                  |
| Data / restraints / parameters    | 4903 / 0 / 255                                                |                  |
| Goodness-of-fit on F <sup>2</sup> | 1.022                                                         |                  |
| Final R indices [I > 2σ(I)]       | R1 = 0.0529, wR2 = 0.1359                                     |                  |
| R indices (all data)              | R1 = 0.0693, wR2 = 0.1477                                     |                  |
| Largest diff. peak and hole       | 0.342 and -0.195 e. Å <sup>-3</sup>                           |                  |

**Figure S25.** Calculation of logK from UV-vis titration experiments.  $[Cs_4L] = 5.0 \times 10^{-5}$  mol/L (in water)

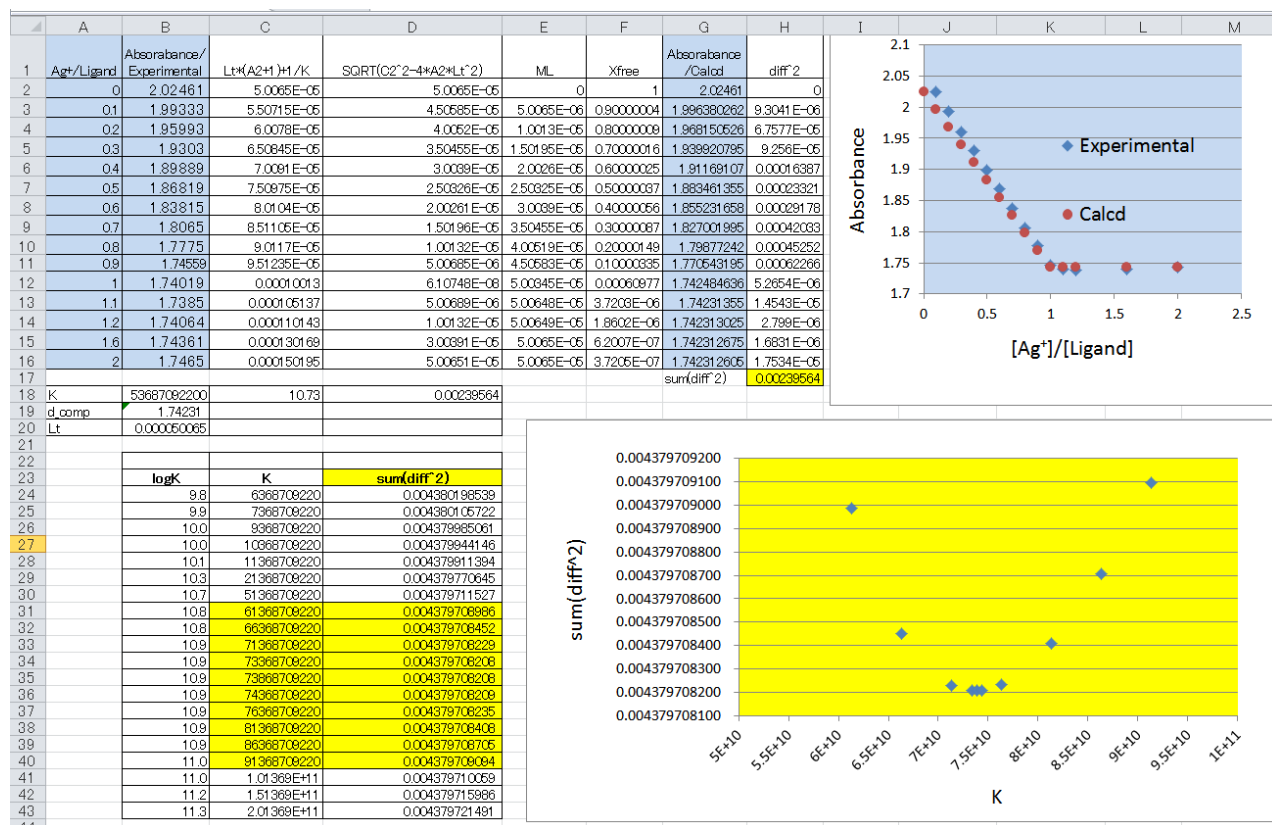

Figure S25 shows Ag<sup>+</sup>-ion-induced UV spectral changes of Cs<sub>4</sub>L. Nonlinear least-squares analyses of the titration profiles clearly indicated the formation of 1:1 complexes, and allowed us to estimate the association constants. The logK value between Cs<sub>4</sub>L and Ag<sup>+</sup> ions in water was estimated to be ca.10.9.
